# Supplementary material for: Collective structural properties of embedded molecular motors in functionalized metal–organic frameworks
Source: Royal Society of Chemistry journal article supplement (doi:10.1039/d0cp06263d), 2021-01-01
Supplement: d0cp06263d1.pdf [file d0cp06263d1.pdf]

## Supplemental information

# Cooperative structural properties of a molecular motor functionalized Metal-Organic Framework: MotorMOF

*Elena Kolodzeiski<sup>1,2,3</sup>, Saeed Amirjalayer<sup>1,2,3\*</sup>*

<sup>1</sup>Physikalisches Institut, Westfälische Wilhelms-Universität Münster, Wilhelm-Klemm-Straße 10, 48149 Münster, Germany.

<sup>2</sup>Center for Nanotechnology, Heisenbergstraße 11, 48149 Münster, Germany.

<sup>3</sup>Center for Multiscale Theory and Computation, Westfälische Wilhelms-Universität Münster, Wilhelm-Klemm-Straße 10, 48149 Münster, Germany.

## **Contents**

- 1. Force Field Parametrization**
- 2. Force Field validation**
  - a. Structural parameters**
  - b. Normal mode analysis**
- 3. Force Field Parameters**
- 4. Genetic Algorithm**
- 5. Dimer Interaction**
- 6. Pore symmetry of an all-meta-stable cell**
- 7. Definition of order parameters**
  - a. Local order parameter**
  - b. Global order parameter**
- 8. Global order parameters of all-meta-stable MOFs**

## 1. Force Field Parameterization

The force field parametrization is carried out following our reported parametrization protocol<sup>1-5</sup>. We extended the previously developed force field by using quantum mechanical (QM) reference data, calculated for a nonperiodic model of the organic motor functionalized linker (Fig. S1) at the density functional theory (DFT) level using the B3LYP+D functional<sup>6, 7</sup> and cc-pVDZ basis set<sup>8</sup> as implemented in Gaussian 16.<sup>9</sup> Analogous to our recently published *Motor-FF*<sup>2</sup>, we defined new atom types for the core moiety of the motor and extended our *phoMOF-FF* parameter set,<sup>1</sup> which we previously parametrized using reference data at the same QM level, accordingly (see Fig. S1, blue marks atom-types of the standard MM3 FF and green/black marks new atom-types defining the core moiety of the molecular motor). The charges of the new atom-types are given by the Merz-Singh-Kollmann<sup>10</sup> charges of the reference system calculated on DFT level.

The parameter set describing the inorganic units is obtained from the *phoMOF-FF*. The parameters set for the inorganic unit together with the new parameter set of the organic motor functionalized linker establish the complete *MotorMOF-FF*. Note, the charges of atoms at connection points between organic and inorganic units or between motor moiety and *phoMOF-FF* atom-types are slightly modified for providing charge-neutrality of the organic building block and the complete MOF.

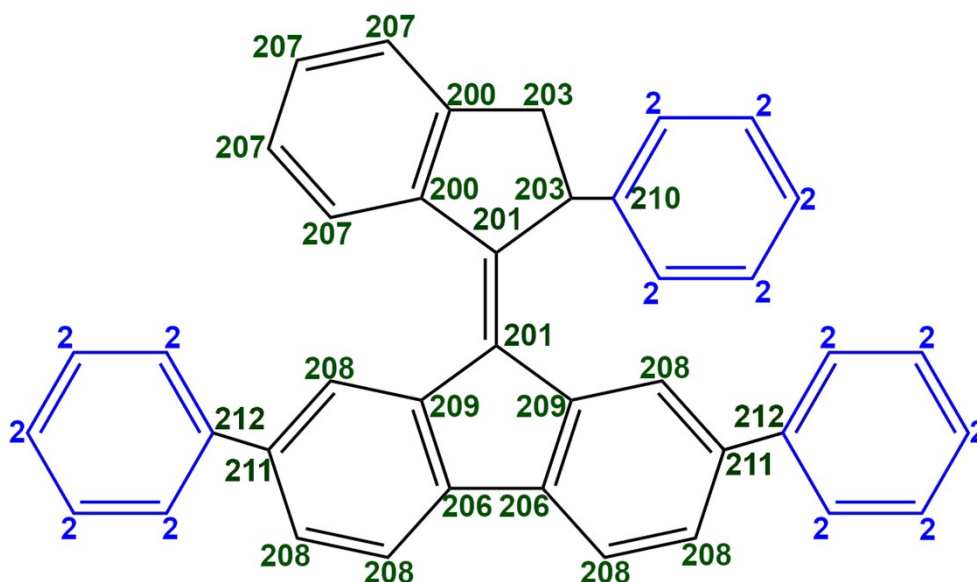

**Figure S1:** Scheme of the building block describing the motor functionalized linker. The green atom-types define the core moiety and blue describes obtained atom-types of the *phoMOF-FF*. The hydrogen (not shown) are represented by two atom-types 5 and 205. Atom-type 5 corresponds to the *phoMOF-FF* and atom-type 205 to the core moiety parameter set.

## 2. Force Field validation

a.

a)

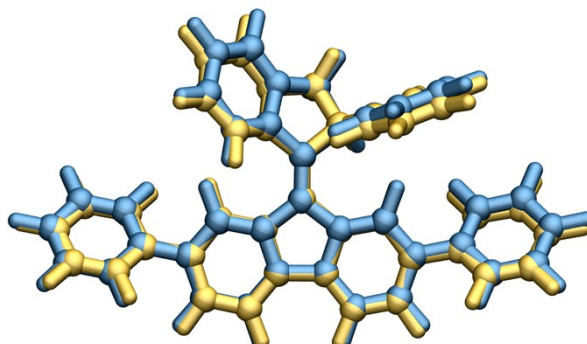

b)

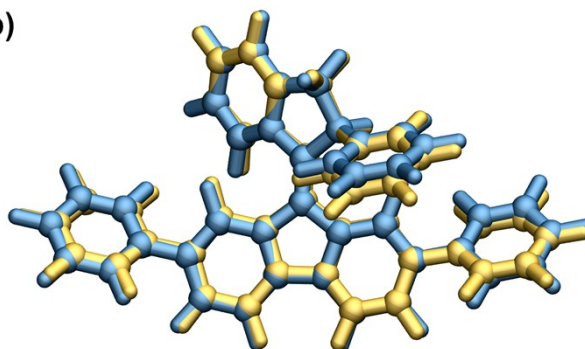

**Figure S2.** Overlay of the ball-and-stick model of the optimized building block structures in the stable (a) and meta-stable (b) state calculated at the DFT (blue) and with the *MotorMOF-FF* (orange) level.

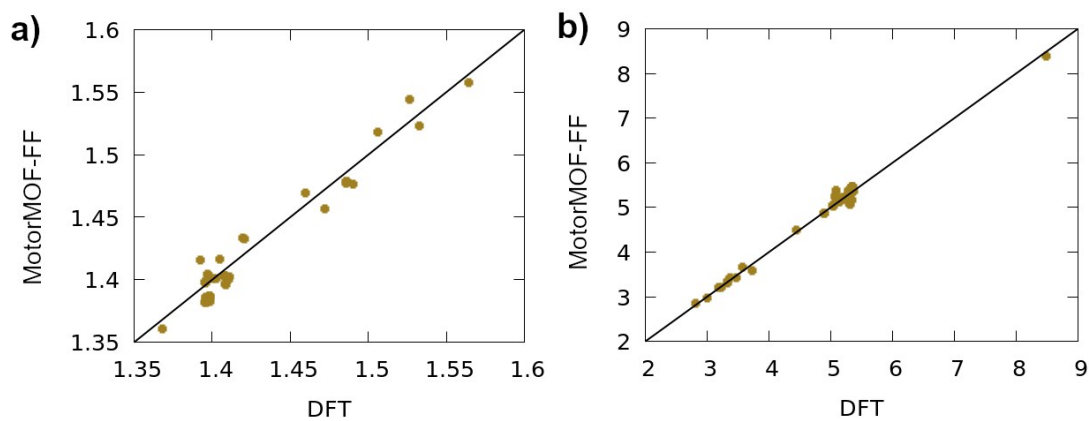

**Figure S3.** Comparison of the bond parameters of the motor-linker in stable state. The data were calculated at B3LYP+D3 level and using *MotorMOF-FF*. The bondlength of the optimized geometries are visualized in a) (in Å) and the corresponding force constants are given in b) (in mdyn/Å).

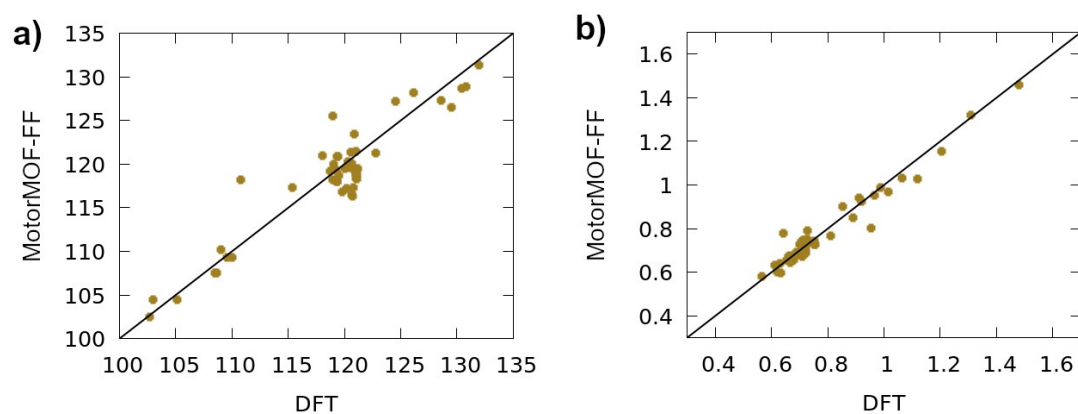

**Figure S4.** Comparison of the angle parameters of the motor-functionalized linker in stable state. The data were calculated on DFT level and using the FF approach. The angles of the optimized geometries are visualized in a) (in °) and the corresponding force constants are given in b) (in mdyn Å /rad<sup>2</sup>).

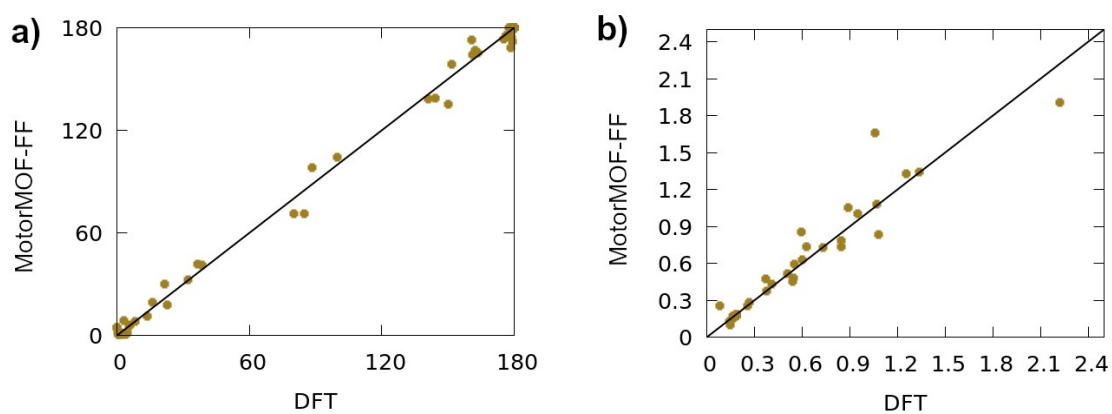

**Figure S5.** Comparison of the dihedral angle parameters of the motor-functionalized linker in stable state. The data were calculated on DFT level and using the FF approach. The dihedral angles of the optimized geometries are visualized in a) (in  $^\circ$ ) and the corresponding force constants are given in b) (in  $\text{mdyn \AA / rad}^2$ ).

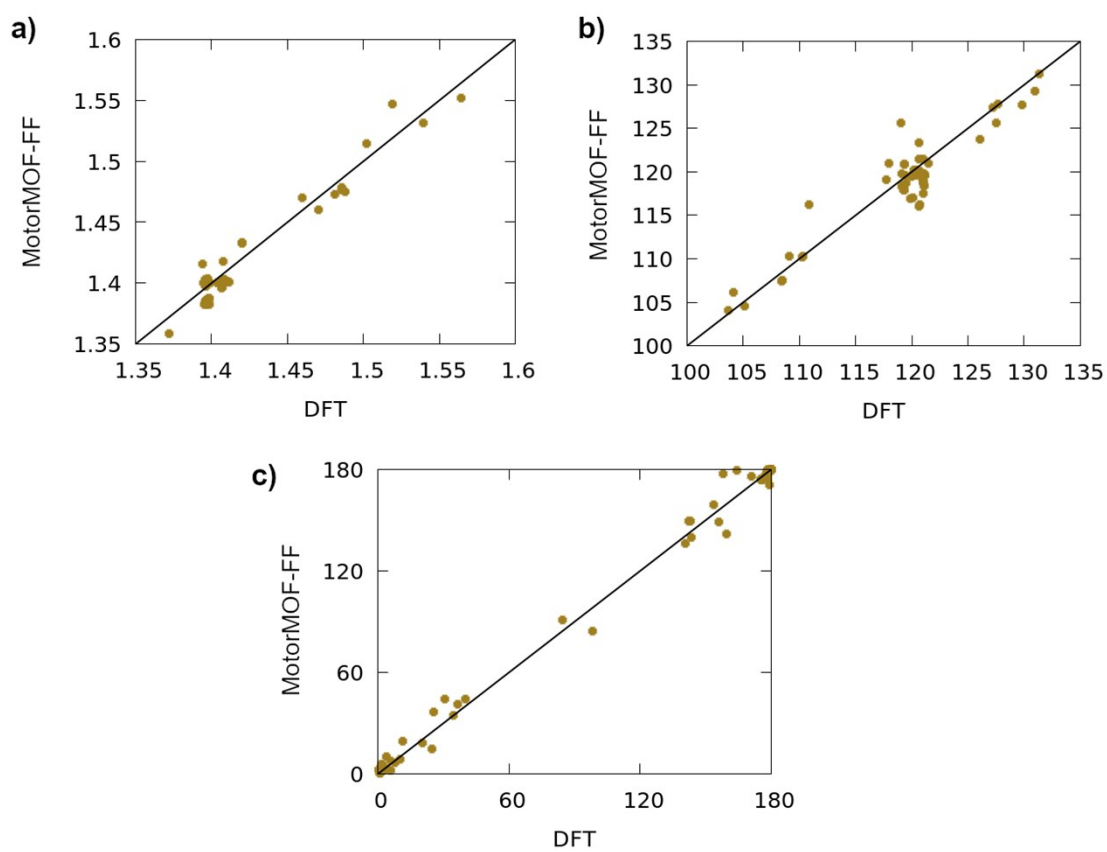

**Figure S6.** Bond length in Å (a), angles in degree (b), dihedral angles in degree (c) of the meta-stable motor functionalized linker calculated on DFT level and using the FF approach.

## b. Normal mode analysis

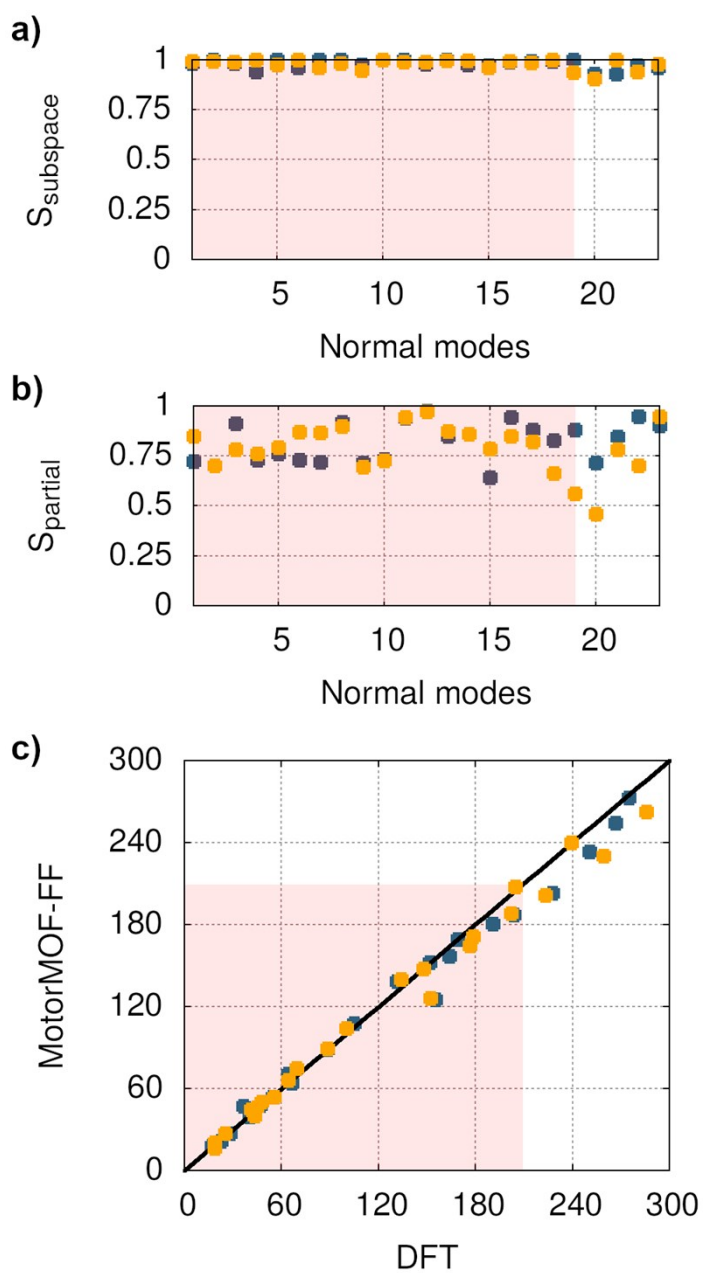

**Figure S7:** Comparison of the normal modes of the motor-functionalized linker in stable (blue) and meta-stable (orange) state. a) shows the projection of the DFT reference modes into the subspace of the *MotorMOF-FF* approach. b) shows the contribution of a single *MotorMOF-FF* mode with the highest agreement to a DFT mode. The x-axis in a) and b) counts the respective normal mode index of the reference system. c) illustrates a comparison of DFT and *MotorMOF-FF* eigenvalues. The red background marks the energy range up to 300 K.



### 3. Force Field Parameters

**Table S1. Parameters for the bond stretch terms for the *MotorMOF-FF***

| Bond stretch            |     | $k_b/\text{mdyn}/\text{\AA}$ | $r_b/\text{\AA}$ |
|-------------------------|-----|------------------------------|------------------|
| 2                       | 210 | 7.0682                       | 1.3320           |
| 200                     | 200 | 5.9640                       | 1.4040           |
| 200                     | 203 | 3.7400                       | 1.5390           |
| 200                     | 207 | 7.0730                       | 1.4100           |
| 201                     | 201 | 8.9700                       | 1.3440           |
| 201                     | 200 | 5.7050                       | 1.4350           |
| 201                     | 203 | 4.7491                       | 1.4920           |
| 203                     | 210 | 4.8374                       | 1.5270           |
| 203                     | 203 | 3.7355                       | 1.5480           |
| 203                     | 205 | 5.2450                       | 1.0870           |
| 206                     | 205 | 5.6550                       | 1.1110           |
| 206                     | 206 | 4.6560                       | 1.4750           |
| 206                     | 208 | 6.8630                       | 1.3880           |
| 207                     | 207 | 6.8910                       | 1.3950           |
| 207                     | 205 | 5.6960                       | 1.0810           |
| 208                     | 208 | 6.9660                       | 1.3730           |
| 208                     | 205 | 5.6720                       | 1.0910           |
| 209                     | 201 | 5.1360                       | 1.4550           |
| 209                     | 205 | 6.5600                       | 1.0650           |
| 209                     | 206 | 5.8270                       | 1.4310           |
| 209                     | 208 | 6.8324                       | 1.3990           |
| 211                     | 212 | 5.5190                       | 1.4580           |
| 211                     | 208 | 6.4840                       | 1.3920           |
| 212                     | 2   | 6.7680                       | 1.3970           |
| From <i>phoMOF-FF</i> : |     |                              |                  |
| 2                       | 2   | 7.3460                       | 1.3800           |
| 2                       | 5   | 5.1500                       | 1.1010           |
| 165                     | 166 | 1.3300                       | 1.9910           |
| 166                     | 167 | 1.3300                       | 1.9910           |
| 167                     | 168 | 9.8260                       | 1.2630           |
| 168                     | 169 | 5.1400                       | 1.1030           |
| 202                     | 2   | 6.6360                       | 1.4000           |
| 202                     | 168 | 5.2380                       | 1.4670           |

**Table S2: Parameters for the in-plane angle bending terms for the *MotorMOF-FF***

| In-plane angle bending |     |     | $k_a/\text{mdyn } \text{\AA} / \text{rad}^2$ | $\Theta_a/\text{deg}$ |
|------------------------|-----|-----|----------------------------------------------|-----------------------|
| 2                      | 210 | 2   | 0.7170                                       | 122.0000              |
| 2                      | 212 | 211 | 1.0500                                       | 112.4860              |
| 2                      | 212 | 2   | 0.6520                                       | 122.0000              |
| 200                    | 200 | 203 | 0.5840                                       | 116.2700              |
| 200                    | 203 | 205 | 0.7770                                       | 113.2590              |
| 200                    | 207 | 205 | 1.0480                                       | 105.8430              |
| 200                    | 207 | 207 | 1.5480                                       | 115.7070              |
| 201                    | 203 | 210 | 0.8380                                       | 117.8670              |
| 201                    | 209 | 205 | 1.8550                                       | 101.4340              |

|                         |     |     |        |          |
|-------------------------|-----|-----|--------|----------|
| 201                     | 209 | 206 | 1.8420 | 112.3290 |
| 201                     | 209 | 208 | 1.0760 | 123.7100 |
| 201                     | 201 | 200 | 0.7300 | 126.0000 |
| 201                     | 201 | 203 | 0.7080 | 125.7230 |
| 201                     | 201 | 205 | 0.8790 | 115.3760 |
| 201                     | 200 | 200 | 1.1070 | 106.5430 |
| 201                     | 200 | 205 | 0.1140 | 117.5520 |
| 201                     | 203 | 203 | 1.2050 | 104.1170 |
| 201                     | 203 | 205 | 0.8180 | 100.7590 |
| 203                     | 210 | 2   | 0.6740 | 122.3000 |
| 203                     | 203 | 210 | 0.9570 | 120.6530 |
| 203                     | 201 | 200 | 0.8330 | 105.6440 |
| 203                     | 200 | 205 | 1.2950 | 105.0670 |
| 203                     | 203 | 200 | 0.7440 | 104.7460 |
| 203                     | 203 | 205 | 0.6970 | 104.7450 |
| 205                     | 203 | 205 | 0.5110 | 110.4650 |
| 206                     | 209 | 205 | 1.7120 | 109.8890 |
| 206                     | 209 | 208 | 0.4370 | 129.5460 |
| 206                     | 206 | 205 | 1.7250 | 100.1540 |
| 206                     | 206 | 208 | 1.0800 | 120.2060 |
| 206                     | 208 | 205 | 0.8220 | 107.6410 |
| 206                     | 208 | 208 | 1.1940 | 116.0070 |
| 207                     | 200 | 201 | 0.5490 | 122.4110 |
| 207                     | 200 | 200 | 0.5810 | 125.4820 |
| 207                     | 200 | 203 | 0.9080 | 128.1550 |
| 207                     | 207 | 205 | 0.9910 | 107.5310 |
| 207                     | 207 | 207 | 1.1980 | 115.4900 |
| 208                     | 208 | 205 | 0.7840 | 110.4980 |
| 208                     | 208 | 208 | 0.9630 | 122.6260 |
| 208                     | 211 | 212 | 1.4930 | 102.2000 |
| 208                     | 211 | 208 | 1.3950 | 122.0000 |
| 209                     | 201 | 209 | 0.5040 | 108.8850 |
| 209                     | 201 | 201 | 1.3220 | 121.0550 |
| 209                     | 201 | 205 | 0.5360 | 104.8620 |
| 209                     | 206 | 205 | 0.7890 | 120.9040 |
| 209                     | 206 | 206 | 0.5990 | 112.5580 |
| 209                     | 206 | 208 | 0.8330 | 123.3960 |
| 209                     | 208 | 205 | 0.7280 | 113.3470 |
| 209                     | 208 | 208 | 0.9920 | 121.7410 |
| 210                     | 2   | 5   | 0.4900 | 120.0000 |
| 210                     | 2   | 2   | 0.8740 | 122.0000 |
| 210                     | 203 | 205 | 0.5500 | 109.5000 |
| 211                     | 208 | 208 | 0.8940 | 122.0000 |
| 211                     | 208 | 209 | 1.0570 | 122.0000 |
| 211                     | 208 | 205 | 0.4900 | 120.0000 |
| 212                     | 2   | 5   | 0.4900 | 120.0000 |
| 212                     | 2   | 2   | 0.8600 | 122.0000 |
| From <i>phoMOF-FF</i> : |     |     |        |          |
| 2                       | 2   | 2   | 0.7600 | 122.0000 |
| 2                       | 2   | 5   | 0.4900 | 120.0000 |
| 2                       | 202 | 2   | 0.7600 | 122.0000 |

|     |     |     |        |          |
|-----|-----|-----|--------|----------|
| 2   | 202 | 168 | 0.8933 | 115.3120 |
| 165 | 166 | 167 | 0.2630 | 105.6000 |
| 166 | 165 | 166 | 0.0256 | 109.6370 |
| 166 | 167 | 168 | 0.1640 | 135.3400 |
| 167 | 168 | 167 | 1.1600 | 128.2760 |
| 167 | 166 | 167 | 0.2630 | 105.6000 |
| 167 | 168 | 202 | 1.1400 | 117.5230 |
| 202 | 2   | 2   | 0.9921 | 122.0000 |
| 202 | 2   | 5   | 0.4900 | 120.0000 |

**Table S3: Parameters for the torsion terms for the extended *MotorMOF-FF*. The force parameters  $V_t^2$  are in kcal/mol, dihedral angle  $\tau_t^2$  in degree and n defines the order of the fourier-term**

| torsion |     |     | $V_t^2$ | $\tau_t^2$ | n   | $V_t^2$ | $\tau_t^2$ | n     | $V_t^2$ | $\tau_t^2$ | n   | $V_t^2$ | $\tau_t^2$ | n   |   |
|---------|-----|-----|---------|------------|-----|---------|------------|-------|---------|------------|-----|---------|------------|-----|---|
| 2       | 212 | 211 | 208     | 0.0000     | 0.0 | 1       | 1.9000     | 180.0 | 2       | 0.0000     | 0.0 | 3       | 0          | 180 | 4 |
| 2       | 212 | 2   | 2       | 1.6940     | 0.0 | 1       | 4.2980     | 180.0 | 2       | 0.0000     | 0.0 | 3       | 0          | 180 | 4 |
| 2       | 212 | 2   | 5       | 0.0000     | 0.0 | 1       | 5.9830     | 180.0 | 2       | 0.0000     | 0.0 | 3       | 0          | 180 | 4 |
| 2       | 210 | 2   | 2       | 4.7620     | 0.0 | 1       | 5.8370     | 180.0 | 2       | 0.0000     | 0.0 | 3       | 0          | 180 | 4 |
| 2       | 210 | 2   | 5       | 0.2500     | 0.0 | 1       | 9.0000     | 180.0 | 2       | 0.0000     | 0.0 | 3       | 0          | 180 | 4 |
| 200     | 201 | 201 | 209     | 9.0590     | 0.0 | 1       | 14.4810    | 180.0 | 2       | 2.8420     | 0.0 | 3       | 0          | 180 | 4 |
| 200     | 201 | 201 | 205     | -0.7780    | 0.0 | 1       | 5.2720     | 180.0 | 2       | 0.0000     | 0.0 | 3       | 0          | 180 | 4 |
| 200     | 200 | 203 | 203     | 1.6040     | 0.0 | 1       | 9.9800     | 180.0 | 2       | 1.2030     | 0.0 | 3       | 0          | 180 | 4 |
| 200     | 200 | 203 | 205     | 0.0000     | 0.0 | 1       | 0.0000     | 180.0 | 2       | 0.0000     | 0.0 | 3       | 0          | 180 | 4 |
| 200     | 200 | 207 | 205     | 0.0000     | 0.0 | 1       | 0.0000     | 180.0 | 2       | 0.0000     | 0.0 | 3       | 0          | 180 | 4 |
| 200     | 200 | 207 | 207     | 2.2010     | 0.0 | 1       | 13.3320    | 180.0 | 2       | 4.7570     | 0.0 | 3       | 0          | 180 | 4 |
| 200     | 207 | 207 | 205     | 0.2500     | 0.0 | 1       | 9.0000     | 180.0 | 2       | -0.5500    | 0.0 | 3       | 0          | 180 | 4 |
| 200     | 207 | 207 | 207     | 8.5070     | 0.0 | 1       | 1.6680     | 180.0 | 2       | 0.2640     | 0.0 | 3       | 0          | 180 | 4 |
| 201     | 209 | 206 | 208     | 1.1030     | 0.0 | 1       | 0.4180     | 180.0 | 2       | 0.4660     | 0.0 | 3       | 0          | 180 | 4 |
| 201     | 209 | 208 | 205     | 0.2500     | 0.0 | 1       | 9.0000     | 180.0 | 2       | -0.5500    | 0.0 | 3       | 0          | 180 | 4 |
| 201     | 209 | 208 | 208     | 8.6160     | 0.0 | 1       | -1.3240    | 180.0 | 2       | 0.9800     | 0.0 | 3       | 0          | 180 | 4 |
| 201     | 201 | 209 | 208     | 5.4350     | 0.0 | 1       | 4.5340     | 180.0 | 2       | 1.9700     | 0.0 | 3       | 0          | 180 | 4 |
| 201     | 201 | 200 | 200     | -0.1270    | 0.0 | 1       | 5.2330     | 180.0 | 2       | 1.2650     | 0.0 | 3       | 0          | 180 | 4 |
| 201     | 200 | 200 | 203     | -0.5260    | 0.0 | 1       | 11.3640    | 180.0 | 2       | 0.0000     | 0.0 | 3       | 0          | 180 | 4 |
| 201     | 200 | 200 | 205     | 0.0000     | 0.0 | 1       | 10.0000    | 180.0 | 2       | 0.0000     | 0.0 | 3       | 0          | 180 | 4 |
| 201     | 200 | 207 | 205     | 0.0000     | 0.0 | 1       | 0.0000     | 180.0 | 2       | 0.0000     | 0.0 | 3       | 0          | 180 | 4 |
| 201     | 200 | 207 | 207     | -1.4290    | 0.0 | 1       | 1.6890     | 180.0 | 2       | 7.5070     | 0.0 | 3       | 0          | 180 | 4 |
| 201     | 203 | 203 | 200     | 1.4100     | 0.0 | 1       | 16.1860    | 180.0 | 2       | 3.6240     | 0.0 | 3       | 0          | 180 | 4 |
| 201     | 203 | 203 | 205     | 0.0000     | 0.0 | 1       | 0.0000     | 180.0 | 2       | 0.5000     | 0.0 | 3       | 0          | 180 | 4 |
| 201     | 203 | 210 | 2       | 0.9470     | 0.0 | 1       | 2.1520     | 165.8 | 2       | -0.7920    | 0.0 | 3       | 0          | 180 | 4 |
| 203     | 201 | 201 | 209     | -2.4950    | 0.0 | 1       | 3.4050     | 180.0 | 2       | 1.6940     | 0.0 | 3       | 0          | 180 | 4 |
| 203     | 201 | 201 | 205     | 0.7730     | 0.0 | 1       | 13.7930    | 180.0 | 2       | -1.0500    | 0.0 | 3       | 0          | 180 | 4 |
| 203     | 201 | 200 | 200     | 2.0410     | 0.0 | 1       | 1.9370     | 180.0 | 2       | 4.8710     | 0.0 | 3       | 0          | 180 | 4 |
| 203     | 200 | 200 | 207     | -2.4330    | 0.0 | 1       | -3.1580    | 180.0 | 2       | 0.0000     | 0.0 | 3       | 0          | 180 | 4 |
| 203     | 203 | 201 | 201     | -0.1510    | 0.0 | 1       | 0.5780     | 180.0 | 2       | 0.7660     | 0.0 | 3       | 0          | 180 | 4 |
| 203     | 203 | 201 | 200     | -2.1760    | 0.0 | 1       | 0.3500     | 180.0 | 2       | -3.9640    | 0.0 | 3       | 0          | 180 | 4 |
| 203     | 210 | 2   | 5       | 0.0000     | 0.0 | 1       | 10.0000    | 180.0 | 2       | 0.0000     | 0.0 | 3       | 0          | 180 | 4 |
| 203     | 210 | 2   | 2       | -2.9570    | 0.0 | 1       | 1.5490     | 180.0 | 2       | 0.0000     | 0.0 | 3       | 0          | 180 | 4 |
| 203     | 203 | 210 | 2       | 0.8210     | 0.0 | 1       | 0.3110     | 180.0 | 2       | -1.7660    | 0.0 | 3       | 0          | 180 | 4 |

|     |     |     |     |         |     |   |         |       |   |         |     |   |   |     |   |
|-----|-----|-----|-----|---------|-----|---|---------|-------|---|---------|-----|---|---|-----|---|
| 205 | 200 | 200 | 203 | 0.0000  | 0.0 | 1 | 10.0000 | 180.0 | 2 | 0.0000  | 0.0 | 3 | 0 | 180 | 4 |
| 205 | 200 | 200 | 205 | 0.0000  | 0.0 | 1 | 11.5000 | 180.0 | 2 | 0.0000  | 0.0 | 3 | 0 | 180 | 4 |
| 205 | 200 | 203 | 203 | 0.0000  | 0.0 | 1 | 0.0000  | 180.0 | 2 | 0.0100  | 0.0 | 3 | 0 | 180 | 4 |
| 205 | 200 | 203 | 205 | 0.0000  | 0.0 | 1 | 0.0000  | 180.0 | 2 | 0.0000  | 0.0 | 3 | 0 | 180 | 4 |
| 205 | 203 | 201 | 201 | 0.0000  | 0.0 | 1 | 0.0000  | 180.0 | 2 | -0.0900 | 0.0 | 3 | 0 | 180 | 4 |
| 205 | 203 | 201 | 200 | 0.0000  | 0.0 | 1 | 0.0000  | 180.0 | 2 | -0.0900 | 0.0 | 3 | 0 | 180 | 4 |
| 205 | 203 | 203 | 200 | 0.0000  | 0.0 | 1 | 0.0000  | 180.0 | 2 | 0.5000  | 0.0 | 3 | 0 | 180 | 4 |
| 205 | 203 | 203 | 205 | 0.0000  | 0.0 | 1 | 0.0000  | 180.0 | 2 | 0.2380  | 0.0 | 3 | 0 | 180 | 4 |
| 205 | 207 | 200 | 200 | 0.2500  | 0.0 | 1 | 9.0000  | 180.0 | 2 | -0.5500 | 0.0 | 3 | 0 | 180 | 4 |
| 205 | 207 | 200 | 203 | 0.2500  | 0.0 | 1 | 9.0000  | 180.0 | 2 | -0.5500 | 0.0 | 3 | 0 | 180 | 4 |
| 205 | 207 | 207 | 205 | 0.2500  | 0.0 | 1 | 9.0000  | 180.0 | 2 | -0.5500 | 0.0 | 3 | 0 | 180 | 4 |
| 205 | 207 | 207 | 207 | 0.2500  | 0.0 | 1 | 9.0000  | 180.0 | 2 | -0.5500 | 0.0 | 3 | 0 | 180 | 4 |
| 205 | 208 | 208 | 209 | 0.2500  | 0.0 | 1 | 9.0000  | 180.0 | 2 | -0.5500 | 0.0 | 3 | 0 | 180 | 4 |
| 205 | 208 | 208 | 205 | 0.2500  | 0.0 | 1 | 9.0000  | 180.0 | 2 | -0.5500 | 0.0 | 3 | 0 | 180 | 4 |
| 205 | 208 | 208 | 206 | 0.2500  | 0.0 | 1 | 9.0000  | 180.0 | 2 | -0.5500 | 0.0 | 3 | 0 | 180 | 4 |
| 205 | 208 | 208 | 208 | 0.2500  | 0.0 | 1 | 9.0000  | 180.0 | 2 | -0.5500 | 0.0 | 3 | 0 | 180 | 4 |
| 205 | 208 | 211 | 208 | 0.0000  | 0.0 | 1 | 5.3850  | 180.0 | 2 | 0.0000  | 0.0 | 3 | 0 | 180 | 4 |
| 205 | 203 | 210 | 2   | 0.0000  | 0.0 | 1 | 0.0000  | 180.0 | 2 | 0.0000  | 0.0 | 3 | 0 | 180 | 4 |
| 206 | 209 | 201 | 209 | 1.7880  | 0.0 | 1 | 11.9660 | 180.0 | 2 | 0.8850  | 0.0 | 3 | 0 | 180 | 4 |
| 206 | 209 | 201 | 201 | 6.9680  | 0.0 | 1 | 3.7720  | 180.0 | 2 | 1.9180  | 0.0 | 3 | 0 | 180 | 4 |
| 206 | 209 | 208 | 205 | 0.2500  | 0.0 | 1 | 9.0000  | 180.0 | 2 | -0.5500 | 0.0 | 3 | 0 | 180 | 4 |
| 206 | 209 | 208 | 208 | 1.5070  | 0.0 | 1 | 1.3800  | 180.0 | 2 | 0.5920  | 0.0 | 3 | 0 | 180 | 4 |
| 206 | 206 | 209 | 201 | 2.6140  | 0.0 | 1 | 7.2860  | 180.0 | 2 | 0.0370  | 0.0 | 3 | 0 | 180 | 4 |
| 206 | 206 | 208 | 205 | 0.2500  | 0.0 | 1 | 9.0000  | 180.0 | 2 | -0.5500 | 0.0 | 3 | 0 | 180 | 4 |
| 206 | 206 | 208 | 208 | -5.3760 | 0.0 | 1 | 0.8330  | 180.0 | 2 | 0.3530  | 0.0 | 3 | 0 | 180 | 4 |
| 206 | 208 | 208 | 205 | 0.2500  | 0.0 | 1 | 9.0000  | 180.0 | 2 | -0.5500 | 0.0 | 3 | 0 | 180 | 4 |
| 206 | 208 | 208 | 208 | -0.8260 | 0.0 | 1 | 5.9360  | 180.0 | 2 | 0.8300  | 0.0 | 3 | 0 | 180 | 4 |
| 207 | 200 | 201 | 201 | 3.3810  | 0.0 | 1 | 3.2860  | 180.0 | 2 | 3.7200  | 0.0 | 3 | 0 | 180 | 4 |
| 207 | 200 | 201 | 203 | -2.4690 | 0.0 | 1 | 2.9420  | 180.0 | 2 | 0.3350  | 0.0 | 3 | 0 | 180 | 4 |
| 207 | 200 | 200 | 201 | -0.2520 | 0.0 | 1 | 10.2920 | 180.0 | 2 | 0.0000  | 0.0 | 3 | 0 | 180 | 4 |
| 207 | 200 | 200 | 207 | -5.1330 | 0.0 | 1 | 11.5900 | 180.0 | 2 | 0.0000  | 0.0 | 3 | 0 | 180 | 4 |
| 207 | 200 | 203 | 203 | 0.9540  | 0.0 | 1 | 6.8400  | 180.0 | 2 | 0.6160  | 0.0 | 3 | 0 | 180 | 4 |
| 207 | 200 | 203 | 205 | 0.2500  | 0.0 | 1 | 9.0000  | 180.0 | 2 | -0.5500 | 0.0 | 3 | 0 | 180 | 4 |
| 207 | 207 | 200 | 200 | 0.5890  | 0.0 | 1 | 10.3650 | 180.0 | 2 | 0.5310  | 0.0 | 3 | 0 | 180 | 4 |
| 207 | 207 | 200 | 203 | 2.3240  | 0.0 | 1 | 3.0050  | 180.0 | 2 | 0.5930  | 0.0 | 3 | 0 | 180 | 4 |
| 207 | 207 | 207 | 205 | 3.1590  | 0.0 | 1 | 4.6390  | 180.0 | 2 | 0.0000  | 0.0 | 3 | 0 | 180 | 4 |
| 207 | 207 | 207 | 207 | 3.2390  | 0.0 | 1 | 2.6730  | 180.0 | 2 | 0.0000  | 0.0 | 3 | 0 | 180 | 4 |
| 207 | 207 | 207 | 207 | 0.5810  | 0.0 | 1 | 9.1790  | 180.0 | 2 | 0.0000  | 0.0 | 3 | 0 | 180 | 4 |
| 208 | 209 | 206 | 208 | 9.0430  | 0.0 | 1 | 3.3530  | 180.0 | 2 | 3.1420  | 0.0 | 3 | 0 | 180 | 4 |
| 208 | 209 | 206 | 206 | 4.7170  | 0.0 | 1 | 9.4870  | 180.0 | 2 | 0.5500  | 0.0 | 3 | 0 | 180 | 4 |
| 208 | 206 | 206 | 208 | 4.1110  | 0.0 | 1 | -2.6390 | 180.0 | 2 | 1.1070  | 0.0 | 3 | 0 | 180 | 4 |
| 208 | 208 | 208 | 206 | 0.6280  | 0.0 | 1 | 3.2120  | 180.0 | 2 | 0.0000  | 0.0 | 3 | 0 | 180 | 4 |
| 208 | 208 | 208 | 208 | 5.9600  | 0.0 | 1 | 0.0270  | 180.0 | 2 | 0.0000  | 0.0 | 3 | 0 | 180 | 4 |
| 208 | 208 | 208 | 209 | -0.3520 | 0.0 | 1 | 3.1900  | 180.0 | 2 | 0.0000  | 0.0 | 3 | 0 | 180 | 4 |
| 208 | 208 | 208 | 205 | 0.2500  | 0.0 | 1 | 9.0000  | 180.0 | 2 | -0.5500 | 0.0 | 3 | 0 | 180 | 4 |
| 208 | 208 | 211 | 208 | 0.4060  | 0.0 | 1 | 22.8540 | 180.0 | 2 | 0.9240  | 0.0 | 3 | 0 | 180 | 4 |
| 209 | 201 | 209 | 208 | 2.1320  | 0.0 | 1 | 2.0490  | 180.0 | 2 | 1.9850  | 0.0 | 3 | 0 | 180 | 4 |
| 209 | 206 | 206 | 209 | 0.5070  | 0.0 | 1 | 7.1740  | 180.0 | 2 | 0.2430  | 0.0 | 3 | 0 | 180 | 4 |
| 209 | 206 | 206 | 208 | -2.5030 | 0.0 | 1 | 8.8130  | 180.0 | 2 | 0.6090  | 0.0 | 3 | 0 | 180 | 4 |
| 209 | 206 | 208 | 205 | 0.0000  | 0.0 | 1 | 0.0000  | 180.0 | 2 | 0.0000  | 0.0 | 3 | 0 | 180 | 4 |
| 209 | 206 | 208 | 208 | -1.0390 | 0.0 | 1 | 18.0920 | 180.0 | 2 | 0.0130  | 0.0 | 3 | 0 | 180 | 4 |

|                         |     |     |     |         |     |   |         |       |   |         |       |   |       |     |   |
|-------------------------|-----|-----|-----|---------|-----|---|---------|-------|---|---------|-------|---|-------|-----|---|
| 209                     | 208 | 208 | 205 | 0.2500  | 0.0 | 1 | 9.0000  | 180.0 | 2 | -0.5500 | 0.0   | 3 | 0     | 180 | 4 |
| 209                     | 208 | 208 | 208 | -0.3050 | 0.0 | 1 | 2.1700  | 180.0 | 2 | 0.0000  | 0.0   | 3 | 0     | 180 | 4 |
| 209                     | 208 | 211 | 208 | 1.0380  | 0.0 | 1 | 7.4220  | 180.0 | 2 | 0.4610  | 0.0   | 3 | 0     | 180 | 4 |
| 210                     | 203 | 201 | 201 | 7.6000  | 0.0 | 1 | 4.1110  | 180.0 | 2 | 2.5200  | 0.0   | 3 | 0     | 180 | 4 |
| 210                     | 203 | 201 | 200 | -1.8770 | 0.0 | 1 | -0.7270 | 180.0 | 2 | -0.3630 | 0.0   | 3 | 0     | 180 | 4 |
| 210                     | 203 | 203 | 200 | -4.5500 | 0.0 | 1 | -0.2880 | 180.0 | 2 | 1.1930  | 0.0   | 3 | 0     | 180 | 4 |
| 210                     | 2   | 2   | 2   | -4.8400 | 0.0 | 1 | 6.3310  | 180.0 | 2 | 0.3640  | 0.0   | 3 | 0     | 180 | 4 |
| 210                     | 2   | 2   | 5   | 0.2500  | 0.0 | 1 | 9.0000  | 180.0 | 2 | 0.0000  | 0.0   | 3 | 0     | 180 | 4 |
| 210                     | 203 | 203 | 205 | 0.0000  | 0.0 | 1 | 0.0000  | 180.0 | 2 | 0.5000  | 0.0   | 3 | 0     | 180 | 4 |
| 211                     | 212 | 2   | 2   | 0.0410  | 0.0 | 1 | 5.5890  | 180.0 | 2 | 0.0000  | 0.0   | 3 | 0     | 180 | 4 |
| 211                     | 212 | 2   | 5   | 0.0000  | 0.0 | 1 | 5.3850  | 180.0 | 2 | 0.0000  | 0.0   | 3 | 0     | 180 | 4 |
| 211                     | 208 | 209 | 201 | 1.7940  | 0.0 | 1 | 8.3280  | 180.0 | 2 | 0.0000  | 0.0   | 3 | 0     | 180 | 4 |
| 211                     | 208 | 209 | 206 | 0.0510  | 0.0 | 1 | 6.3240  | 180.0 | 2 | 0.2960  | 0.0   | 3 | 0     | 180 | 4 |
| 211                     | 208 | 208 | 206 | 0.9310  | 0.0 | 1 | 6.6230  | 180.0 | 2 | 3.7950  | 0.0   | 3 | 0     | 180 | 4 |
| 211                     | 208 | 208 | 205 | 0.0000  | 0.0 | 1 | 5.3850  | 180.0 | 2 | 0.0000  | 0.0   | 3 | 0     | 180 | 4 |
| 212                     | 2   | 2   | 2   | 0.1560  | 0.0 | 1 | 11.1700 | 180.0 | 2 | 0.0030  | 0.0   | 3 | 0     | 180 | 4 |
| 212                     | 211 | 208 | 208 | 4.0290  | 0.0 | 1 | 3.0660  | 180.0 | 2 | 0.0230  | 0.0   | 3 | 0     | 180 | 4 |
| 212                     | 211 | 208 | 209 | 9.0510  | 0.0 | 1 | 10.3820 | 180.0 | 2 | -3.8190 | 0.0   | 3 | 0     | 180 | 4 |
| 212                     | 211 | 208 | 205 | 0.0000  | 0.0 | 1 | 5.3850  | 180.0 | 2 | 0.0000  | 0.0   | 3 | 0     | 180 | 4 |
| 212                     | 2   | 2   | 202 | 0.0000  | 0.0 | 1 | 5.9830  | 180.0 | 2 | 0.0000  | 0.0   | 3 | 0     | 180 | 4 |
| 212                     | 2   | 2   | 5   | 0.0000  | 0.0 | 1 | 5.3850  | 180.0 | 2 | 0.0000  | 0.0   | 3 | 0     | 180 | 4 |
| From <i>phoMOF-FF</i> : |     |     |     |         |     |   |         |       |   |         |       |   |       |     |   |
| 2                       | 2   | 2   | 2   | 0.0000  | 0.0 | 1 | 5.9830  | 180.0 | 2 | 0.0000  | 0.0   | 3 | 0     | 180 | 4 |
| 2                       | 2   | 2   | 5   | 0.0000  | 0.0 | 1 | 5.3850  | 180.0 | 2 | 0.0000  | 0.0   | 3 | 0     | 180 | 4 |
| 2                       | 2   | 2   | 202 | 0.0000  | 0.0 | 1 | 5.9830  | 180.0 | 2 | 0.0000  | 0.0   | 3 | 0     | 180 | 4 |
| 2                       | 2   | 202 | 168 | 0.0000  | 0.0 | 1 | 5.9830  | 180.0 | 2 | 0.0000  | 0.0   | 3 | 0     | 180 | 4 |
| 2                       | 202 | 2   | 2   | 0.0000  | 0.0 | 1 | 5.9830  | 180.0 | 2 | 0.0000  | 0.0   | 3 | 0     | 180 | 4 |
| 2                       | 202 | 2   | 5   | 0.0000  | 0.0 | 1 | 5.3850  | 180.0 | 2 | 0.0000  | 0.0   | 3 | 0     | 180 | 4 |
| 5                       | 2   | 2   | 5   | 0.0000  | 0.0 | 1 | 6.8810  | 180.0 | 2 | 0.0000  | 0.0   | 3 | 0     | 180 | 4 |
| 165                     | 166 | 167 | 168 | 0.0000  | 0.0 | 1 | 0.0000  | 180.0 | 2 | 0.0000  | 0.0   | 3 | 0     | 180 | 4 |
| 166                     | 167 | 168 | 2   | 0.0000  | 0.0 | 1 | 0.0000  | 180.0 | 2 | 0.0000  | 0.0   | 3 | 0     | 180 | 4 |
| 166                     | 165 | 166 | 167 | 0.0000  | 0.0 | 1 | 0.0000  | 180.0 | 2 | 0.0000  | 180.0 | 3 | 0     | 180 | 4 |
| 166                     | 167 | 168 | 167 | 0.0000  | 0.0 | 1 | 4.1080  | 180.0 | 2 | 0.0000  | 0.0   | 3 | 0     | 180 | 4 |
| 166                     | 167 | 168 | 169 | 0.7792  | 0.0 | 1 | 2.6942  | 180.0 | 2 | 0.6103  | 0.0   | 3 | 0     | 180 | 4 |
| 166                     | 167 | 168 | 202 | 0.1130  | 0.0 | 1 | 3.1380  | 180.0 | 2 | 3.6880  | 0.0   | 3 | 0     | 180 | 4 |
| 167                     | 166 | 167 | 168 | 0.0000  | 0.0 | 1 | 0.0000  | 0.0   | 2 | 0.0000  | 180.0 | 3 | 0     | 180 | 4 |
| 167                     | 168 | 202 | 2   | 0.0000  | 0.0 | 1 | 4.6900  | 180.0 | 2 | 0.0000  | 0.0   | 3 | 0.198 | 180 | 4 |
| 168                     | 202 | 2   | 5   | 0.0000  | 0.0 | 1 | 5.3850  | 180.0 | 2 | 0.0000  | 0.0   | 3 | 0     | 180 | 4 |
| 168                     | 202 | 2   | 5   | 0.0000  | 0.0 | 1 | 5.3850  | 180.0 | 2 | 0.0000  | 0.0   | 3 | 0     | 180 | 4 |
| 202                     | 2   | 2   | 5   | 0.0000  | 0.0 | 1 | 5.3850  | 180.0 | 2 | 0.0000  | 0.0   | 3 | 0     | 180 | 4 |
| 202                     | 2   | 2   | 2   | 0.3820  | 0.0 | 1 | 9.5100  | 180.0 | 2 | 0.0000  | 0.0   | 3 | 0     | 180 | 4 |

**Table S4. Parameters for the non-bonded terms of the *MotorMOF-FF***

| Atom-type | radius 0.5 $d_n^0/\text{\AA}$ | $\epsilon_n/\text{kcal/mol}$ | bondlength reduction factor | charge  |
|-----------|-------------------------------|------------------------------|-----------------------------|---------|
| 200       | 1.960                         | 0.056                        |                             | 0.0661  |
| 201       | 1.960                         | 0.056                        |                             | -0.0536 |
| 203       | 2.040                         | 0.027                        |                             | -0.1158 |

|                         |       |       |       |         |
|-------------------------|-------|-------|-------|---------|
| 205                     | 1.620 | 0.020 | 0.923 | 0.1115  |
| 206                     | 1.960 | 0.056 |       | 0.0285  |
| 207                     | 1.960 | 0.056 |       | -0.1409 |
| 208                     | 1.960 | 0.056 |       | -0.1682 |
| 209                     | 1.960 | 0.056 |       | 0.0998  |
| 210                     | 1.960 | 0.056 |       | 0.1635  |
| 211                     | 1.960 | 0.056 |       | -0.0227 |
| 212                     | 1.960 | 0.056 |       | -0.0227 |
| from <i>phoMOF-FF</i> : |       |       |       |         |
| 2                       | 1.960 | 0.056 |       | -0.1200 |
| 5                       | 1.620 | 0.020 | 0.923 | 0.1200  |
| 165                     | 1.820 | 0.059 |       | -1.4060 |
| 166                     | 2.290 | 0.276 |       | 1.3040  |
| 167                     | 1.820 | 0.059 |       | -0.6610 |
| 168                     | 1.940 | 0.056 |       | 0.8070  |
| 202                     | 1.960 | 0.056 |       | 0.0000  |

**Table S5. Parameters for the Out-of-plane terms of the *MotorMOF-FF***

| Out-of-plane bending | $\Theta_0/\text{deg}$ | $k_0/\text{mdyn \AA} / \text{rad}^2$ |
|----------------------|-----------------------|--------------------------------------|
| 2                    | 210                   | 0.0000                               |
| 2                    | 212                   | 0.0000                               |
| 200                  | 207                   | 0.0000                               |
| 200                  | 203                   | 0.0000                               |
| 200                  | 201                   | 0.0000                               |
| 200                  | 200                   | 0.0000                               |
| 201                  | 200                   | 0.0000                               |
| 201                  | 209                   | 0.0000                               |
| 201                  | 201                   | 0.0000                               |
| 201                  | 200                   | 0.0000                               |
| 201                  | 203                   | 0.0000                               |
| 203                  | 201                   | 0.0000                               |
| 203                  | 200                   | 0.0000                               |
| 205                  | 208                   | 0.0000                               |
| 206                  | 209                   | 0.0000                               |
| 206                  | 205                   | 0.0000                               |
| 206                  | 206                   | 0.0000                               |
| 206                  | 208                   | 0.0000                               |
| 207                  | 205                   | 0.0000                               |
| 207                  | 207                   | 0.0000                               |
| 207                  | 200                   | 0.0000                               |
| 208                  | 209                   | 0.0000                               |
| 209                  | 208                   | 0.0000                               |
| 208                  | 206                   | 0.0000                               |
| 206                  | 208                   | 0.0000                               |
| 208                  | 208                   | 0.0000                               |
| 208                  | 208                   | 0.0000                               |
| 208                  | 205                   | 0.0000                               |

|                         |     |        |        |
|-------------------------|-----|--------|--------|
| 208                     | 211 | 0.0000 | 0.0000 |
| 209                     | 209 | 0.0000 | 0.0000 |
| 209                     | 201 | 0.0000 | 0.0000 |
| 209                     | 205 | 0.0000 | 0.0000 |
| 209                     | 206 | 0.0000 | 0.0000 |
| 209                     | 208 | 0.0000 | 0.0000 |
| 210                     | 2   | 0.0000 | 0.2000 |
| 210                     | 203 | 0.0000 | 0.1000 |
| 211                     | 212 | 0.0000 | 1.2500 |
| 211                     | 208 | 0.0000 | 0.0000 |
| 212                     | 211 | 0.0000 | 1.2500 |
| 212                     | 2   | 0.0000 | 0.0000 |
| from <i>phoMOF-FF</i> : |     | 0.0000 |        |
| 2                       | 2   | 0.0000 | 0.2000 |
| 2                       | 5   | 0.0000 | 0.2000 |
| 2                       | 202 | 0.0000 | 0.6013 |
| 168                     | 167 | 0.0000 | 2.5000 |
| 168                     | 202 | 0.0000 | 0.6485 |
| 202                     | 2   | 0.0000 | 0.5084 |
| 202                     | 168 | 0.0000 | 0.5643 |

**Table S6: Parameters for the combined stretch-stretch and stretch-bend cross terms of the *MotorMOF-FF***

| Combined stretch-stretch and stretch-bend cross terms |     |     | $k_{sb1}/\text{mdyn/rad}$ | $k_{s2}/\text{mdyn/rad}$ | $k_{ss}/\text{mdyn/Å}$ |
|-------------------------------------------------------|-----|-----|---------------------------|--------------------------|------------------------|
| 2                                                     | 2   | 2   | 0.124                     | 0.124                    | 1.061                  |
| 2                                                     | 202 | 2   | 0.124                     | 0.124                    | 1.061                  |
| 166                                                   | 165 | 166 | 0.035                     | 0.035                    | 0.356                  |
| 167                                                   | 168 | 167 | 0.413                     | 0.413                    | 2.697                  |
| 167                                                   | 168 | 202 | 0.500                     | 0.400                    | 0.600                  |
| 168                                                   | 202 | 2   | 0.353                     | 0.092                    | 0.293                  |

#### 4. Genetic Algorithm

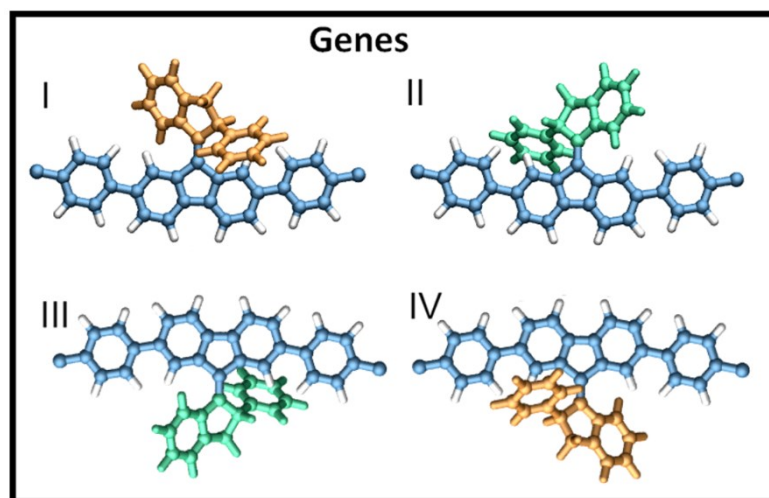

**Figure S8.** Four conformers of motor functionalized linker in meta-stable state, defining the possibilities of a gene for the GA.



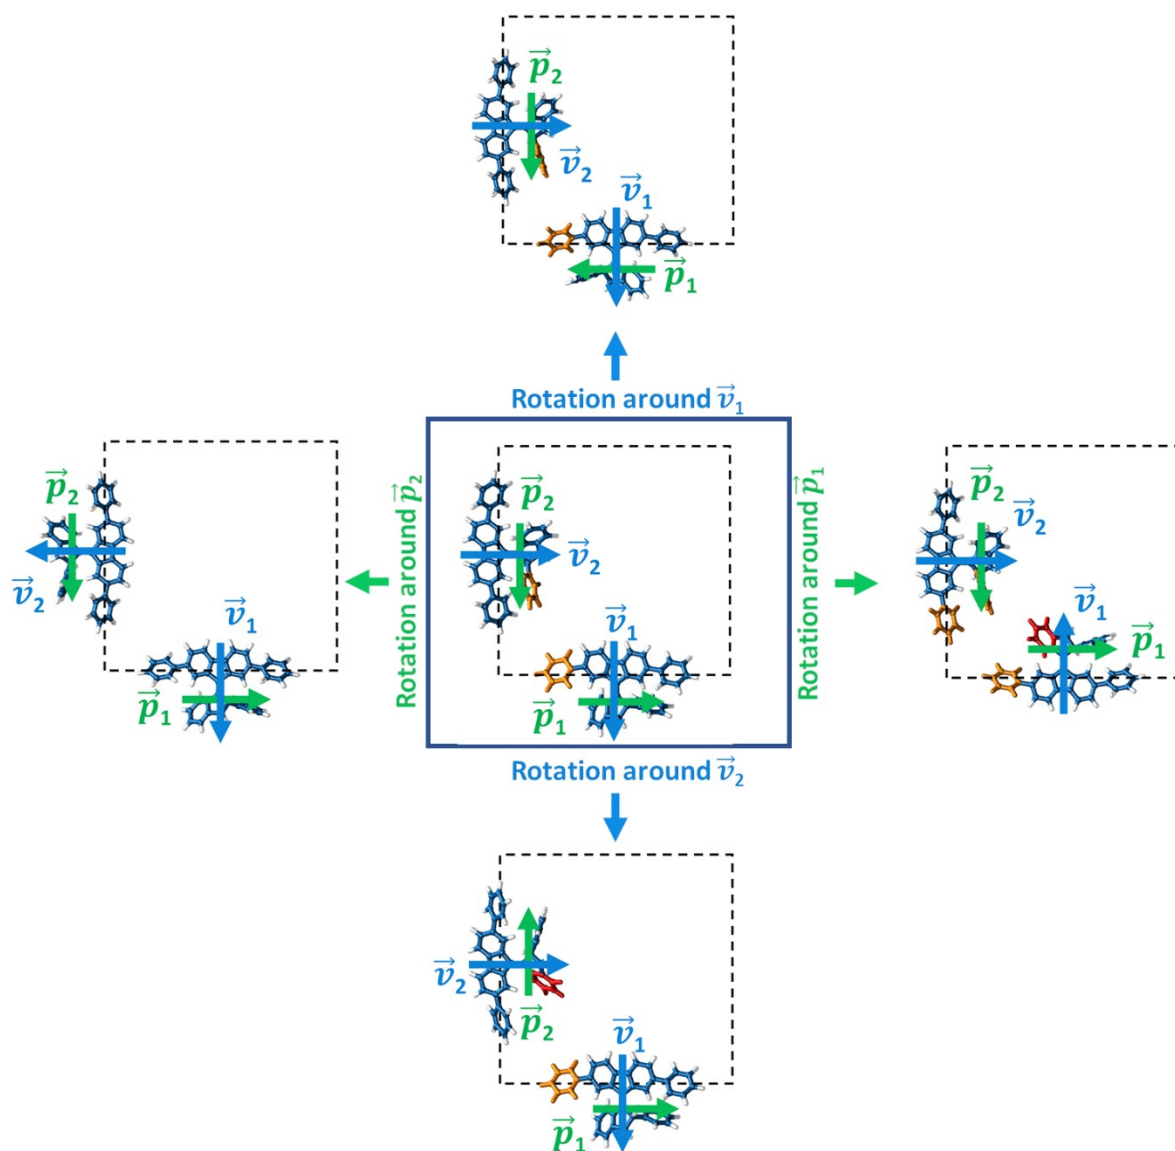

## 5. Dimer Interaction

**Figure S9.** Visualization of the rotations around the characteristic vectors  $\vec{v}_1$ ,  $\vec{p}_1$ ,  $\vec{v}_2$  and  $\vec{p}_2$  starting from an initial dimer-structure (center image) a rectangular pattern. For rotations around  $\vec{p}$  the rotation axis is placed along the grid. For simplicity only rotations around 180° are shown. The interaction ring-units are colored. Red indicates the benzene of the rotor, involved in the dimer interaction and orange involved phenyl-units.

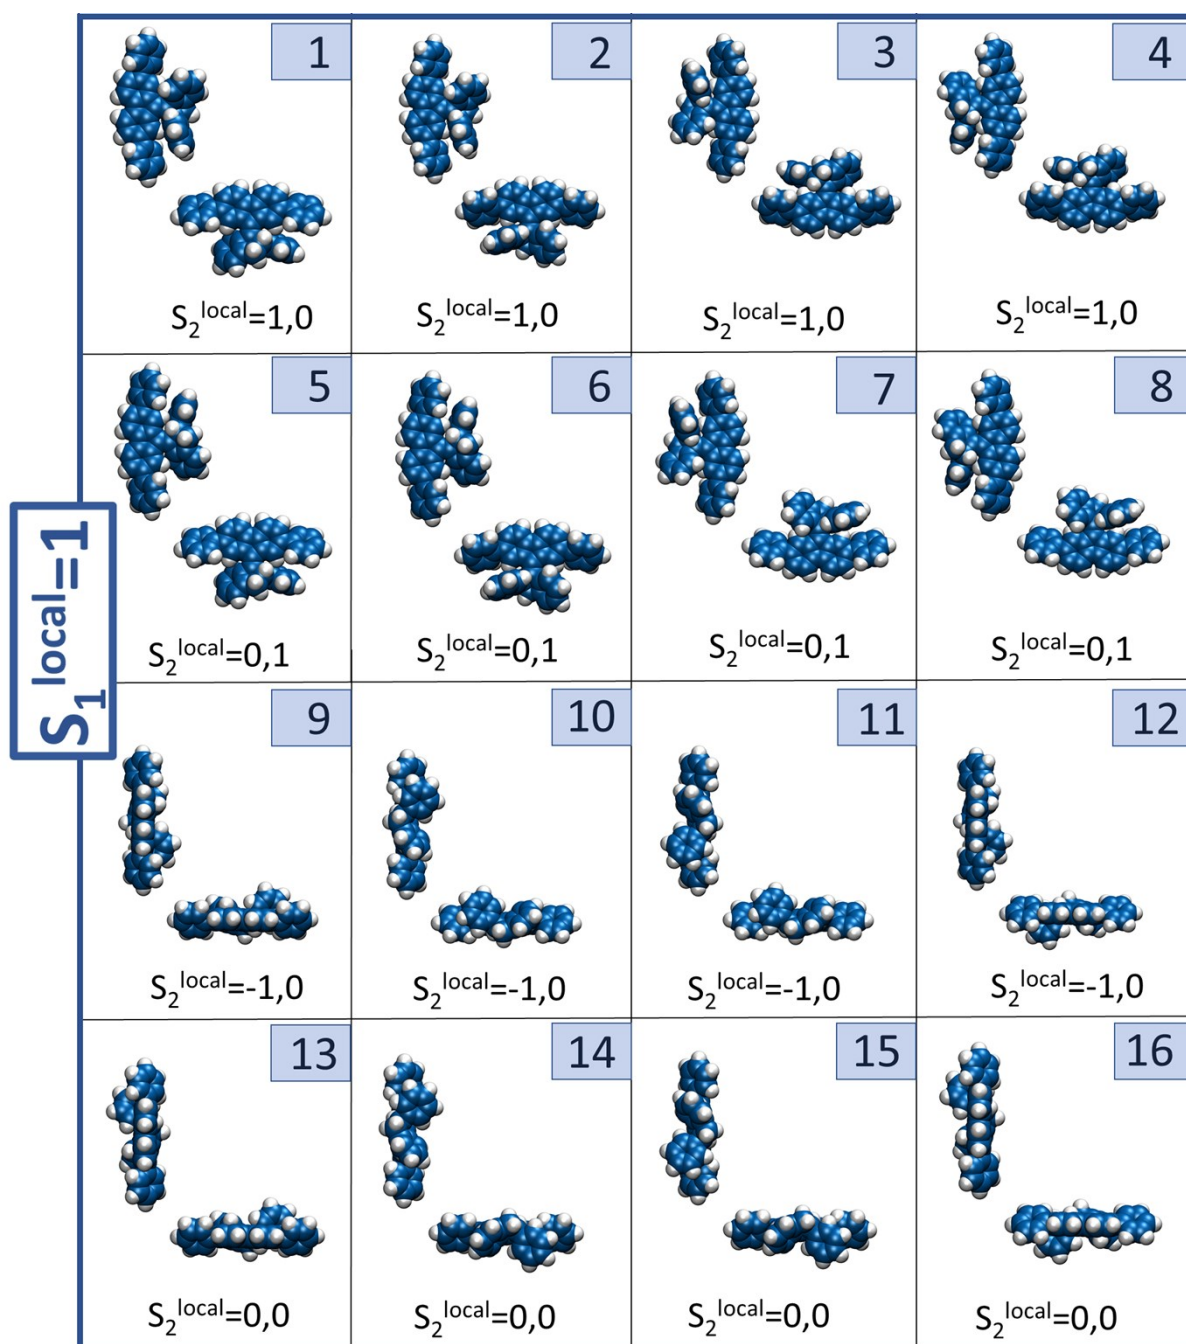

**Figure S10.** Visualization of all motor dimer-structures on a rectangular pattern with order parameter  $S_1=1$ .

For simplicity only motors in stable state are shown.

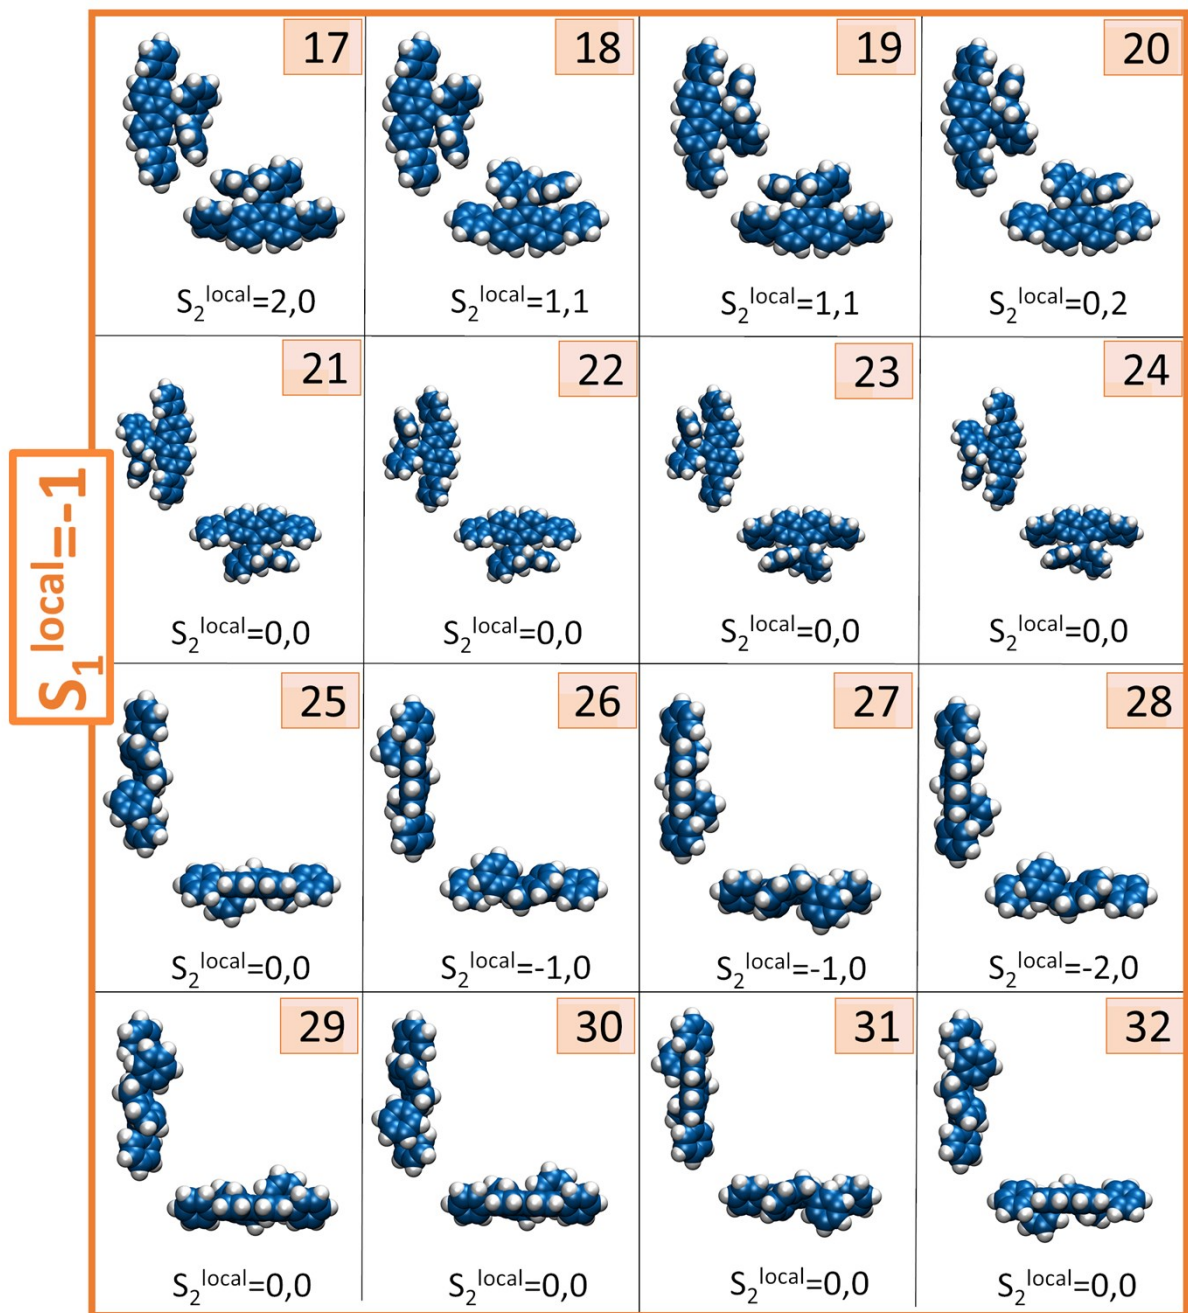

**Figure S11.** Visualization of all motor dimer-structures on a rectangular pattern with order parameter  $S_1=-1$ . For simplicity only motors in stable state are shown.

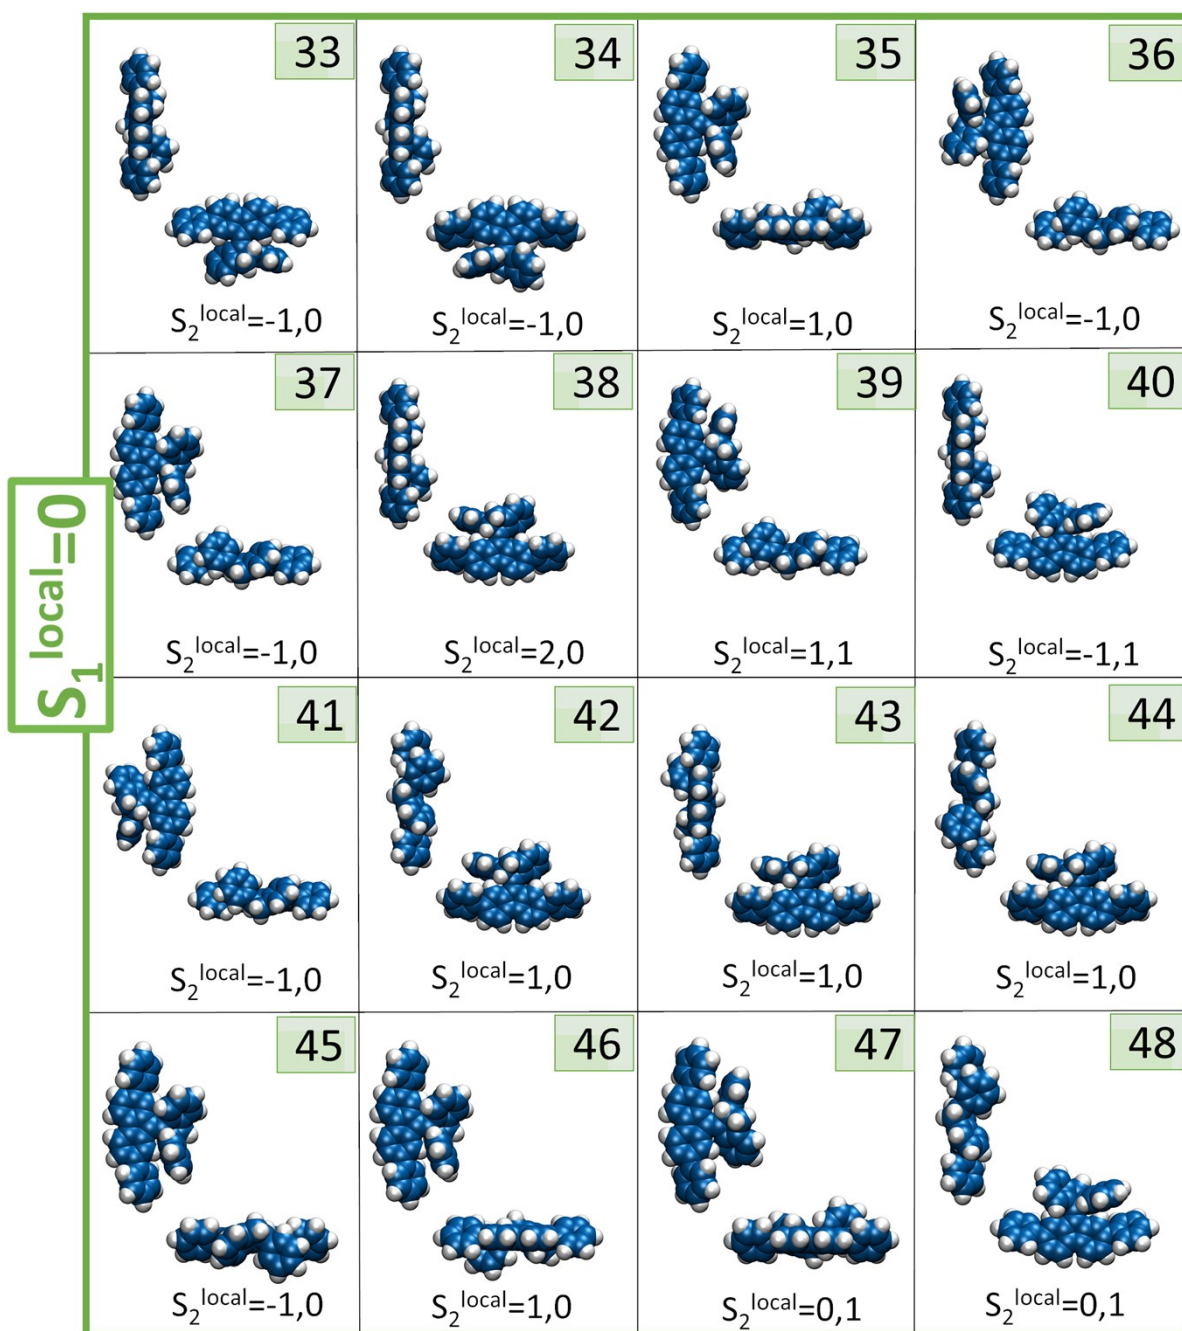

**Figure S12.** Visualization of half number of motor dimer-structures on a rectangular pattern with order parameter  $S_1=0$ . Remaining dimer-structures are shown in Figure S.13. For simplicity only motors in stable state are shown.



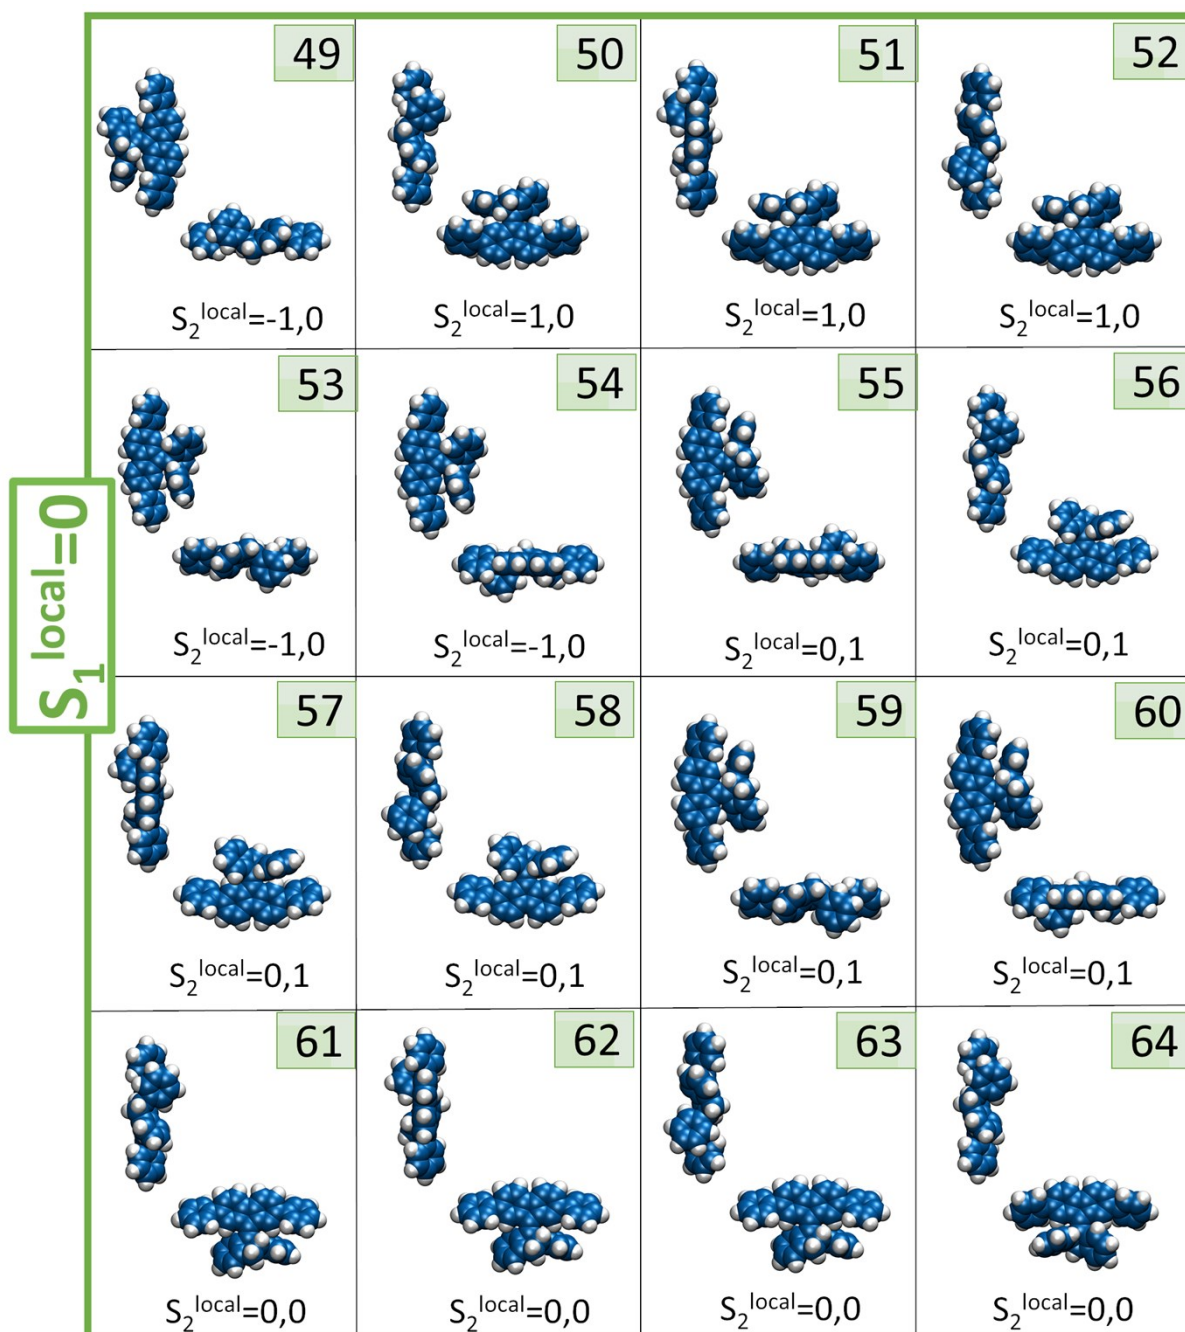

**Figure S13.** Visualization of half number of motor dimer-structures on a rectangular pattern with order parameter  $S_1=0$ . Remaining dimer-structures are shown in Figure S.12. For simplicity only motors in stable state are shown.

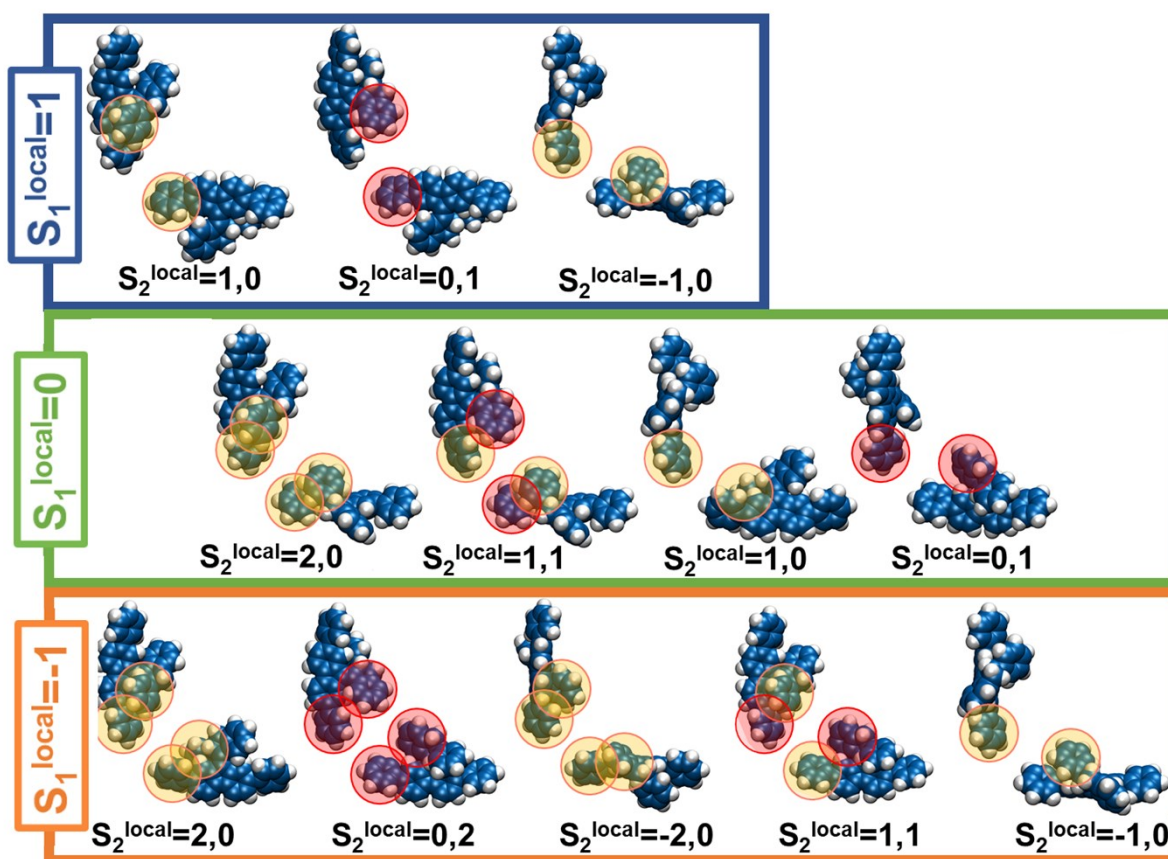

**Figure S14.** Visualization of different classes of interactions of motor functionalized linkers in meta-stable state on a rectangular pattern, representing the pore topology.

**Table S1.** Interaction energies in kcal/mol calculated on *MotorMOF-FF* and B3LYP+D level of dimers in different dimer classes of motor functionalized linkers in stable and meta-stable state. The orientated monomers are pre-optimized on *MotorMOF-FF* and B3LYP+D level respectively.

|          | stable        |                    | meta-stable   |                    |
|----------|---------------|--------------------|---------------|--------------------|
|          | B3LYP+D       | <i>MotorMOF-FF</i> | B3LYP+D       | <i>MotorMOF-FF</i> |
| $S_1=1$  | $0.1 \pm 0.1$ | $0.2 \pm 0.1$      | $0.2 \pm 0.1$ | $0.2 \pm 0.1$      |
| $S_1=0$  | $0.2 \pm 0.1$ | $0.2 \pm 0.1$      | $0.1 \pm 0.1$ | $0.1 \pm 0.1$      |
| $S_1=-1$ | $0.2 \pm 0.1$ | $0.2 \pm 0.1$      | $0.1 \pm 0.1$ | $0.1 \pm 0.1$      |

## 6. Pore symmetry of an all-meta-stable cell

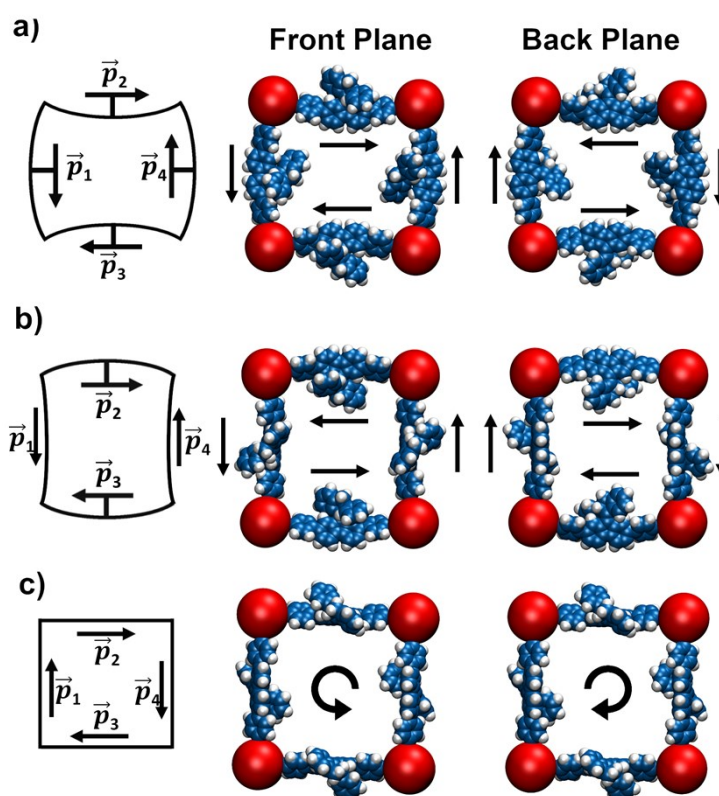

**Figure S15.** Van-der-Waals representation from a-direction (a), b-direction (b) and c-direction (c) of front and back plane of an **all-meta-stable** cell. The local ordering defined by  $\vec{p}$ -vectors are visualized by black arrows

## 7. Definition of order parameters

For characterizing and quantifying the symmetry different order parameters are defined, describing local interactions (S7a), interactions over planes of the cubic MOF-structure (S7b) and global properties, describing the network in all three dimensions (S7c)

### a. Local order parameter

The local order parameters  $S_1^{local}$  and  $S_2^{local}$  describe the relative orientation between two linkers aligned on a rectangular grid, which represents the pore topology, and allows thus a classification according to the order parameters. The order parameter  $S_1^{local}$  is defined by:

$$S_1^{local} = \vec{v}_i R_n \vec{v}_{i+1} \in [-1, 1] \quad (1)$$

with  $\vec{v}$  defined by the directions of the C=C double bond, pointing from the stator to the rotor part and subsequently projected onto the closest MOF plane.

The second order parameter  $S_2^{\text{local}}$  correlates the orientation of the ring-units of the respective rotor with relative arrangement of possible interaction partners. Therefore,  $S_2^{\text{local}}$  counts how many phenyl- and benzene-units of adjacent linkers are close enough for significant van der Waals interaction. In this regard a cut-off radius of 12 Å is introduced. For accomplishing the requirements,  $S_2^{\text{local}}$  is defined as a tuple of two values, where the first value counts the number of phenyl- and the second value counts the number benzene-interactions, which are within the cut-off radius. A minus sign indicates that the  $\vec{v}$ -vectors of both linkers are perpendicular to the rectangular plane.

This approach can be extended to analyze the geometry of a MotorMOF plane, by disassembling the layer into all possible pairs of linker-dimers. The order parameter  $S_1^{\text{plane}}$  is defined as the average of  $S_1^{\text{local}}$  over all linker-dimers

$$S_{1,j}^{\text{plane}} = \frac{1}{4n_c} \sum_c \sum_{i=1}^4 S_{1,i,c}^{\text{local}} \in [-1,1], \quad (2)$$

where the sum goes over all linker-dimers of the same plane around a corner ( $n_i$ ) and further over all corners included in the used unit cell ( $n_c$ ). In this way all linker-dimers corresponding to a MOF-plane are considered. Note, the used unit cell consists of two planes per crystallographic direction labeled with the variable  $j$ . Based on this, the plane order parameters are calculated by

$$S_1^{\text{plane}} = \frac{1}{2} \sum_{j=1}^2 S_{1,j}^{\text{plane}} \in [-1,1]. \quad (3)$$

The corresponding order parameter  $S_2^{\text{plane}}$  is given by the distribution of occurring interaction types visualized in Fig. 3c).

### b. Global correlation parameter

The global correlation parameter  $S_1^{\text{global}}$  is defined to evaluate correlation and ordering within a three-dimensional MotorMOF system. Here, the energetically most preferred MotorMOF structure is used as reference to calculate the correlation parameter  $S_1^{\text{global}}$ , which considers



the symmetry of the a-plane described by  $S_1^{\text{plane},a}$  with respect to the perpendicular b-plane. Based on this, all dimers within the a-plane and all linker perpendicular are considered and correlated. The ordering between linkers of the a-plane and the b-plane is thus calculated by

$$S_{1,j}^{\text{corr}-a,b} = \frac{1}{4n_c} \sum_c^{n_c} \sum_i^4 (\vec{v}_i \times \vec{v}_{i+1}) \cdot \vec{e}_n \in [-1,1], \quad (4)$$

where  $\vec{e}_n$  is the normal vector of the MOF-plane perpendicular to the crystallographic b-direction and  $j$  numbers the respective layer within the unit cell.

The total correlation parameter is therefore defined by

$$S_1^{\text{corr}-a,b} = \frac{1}{2} \left| \sum_{j=1}^2 S_{1,j}^{\text{corr}-a,b} \right| \in [0,1] \quad (5)$$

where  $j$  counts the planes per crystallographic direction, and according to these definitions follows:

$$S_1^{\text{global}} = \frac{1}{2} (S_1^{\text{plane},a} + S_1^{\text{corr}-a,b}) \in [-1,1]. \quad (6)$$

The global correlation parameter  $S_1^{\text{global}}$  describes the linkers arrangement along the a-plane by  $S_1^{\text{plane},a}$  and considers at the same time the remaining linkers perpendicular to that by  $S_{1,j}^{\text{corr}-a,b}$ .

Note, equation (4) is strongly related to equation (2) describing the symmetry of the b-plane by  $S_{1,j}^{\text{plane},b}$ , but it is modified by the cross product. This modification results in a maximized global correlation parameter  $S_1^{\text{global}}=1$  for the energetically preferred pore topology of the MotorMOF. By applying this formalism on other MotorMOFs with different linker configurations, a value of  $S_1^{\text{global}}=1$  indicates the same pore topology in all three crystallographic directions with respect to the energetically preferred MotorMOF. Whereas a value of  $S_1^{\text{global}}=0$  implies that the topology of the compared structure differs significantly from the predesign energetically lowest MOF topology. The definition of equation (4) thus enables to compare the overall pore topology of different MotorMOFs and thus quantify structural correlations.

Since the order parameter  $S_1^{global}$  only considers the direction of the rotor with respect to the stator ( $\vec{v}$ ) and thus the curvature of the MOF scaffold, a second global correlation parameter  $S_p^{global}$ , is introduced to take into account the local pore symmetry. The global correlation parameter  $S_p^{global}$ , describes the relative orientation of neighboring rotors  $\vec{p}$  by a local pore order parameter  $S_p^{local}$ , which is defined analogous to equation (1) by

$$S_p^{local} = \vec{p}_i R_n \vec{p}_{i+1} \in [-1,1], \quad (7)$$

where the rotation matrix  $R_n$  rotates a linker of the pore anticlockwise along the pore plane on its neighbor. The global order parameter  $S_p^{global}$  is defined as the average over the plane-related order parameters  $S_p^{plane}$  given by

$$S_{pj}^{plane} = \frac{1}{n_c n_l} \sum_c \sum_{i=1}^4 S_{p,i,c}^{local} \cdot f(plane) \in [-1,1] \quad (8)$$

Considering both layers within the unit cell  $S_p^{plane}$  is

$$S_p^{plane} = \frac{1}{2} \sum_{j=1}^2 S_{pj}^{plane} \in [-1,1]. \quad (9)$$

For describing all linkers with respect to each other, two planes must be involved for the  $S_p^{global}$  calculation:

$$S_p^{global} = \frac{1}{2} (S_p^{plane,a} + S_p^{plane,b}) \in [-1,1] \quad (10)$$

Using the sign-function, the pore symmetry of the energetically preferred MotorMOF, depicted in Fig. 4 for **all-stable** and in Fig. S10 for **all-meta-stable** MotorMOF, gives a value of 1 for  $S_p^{global}$ .

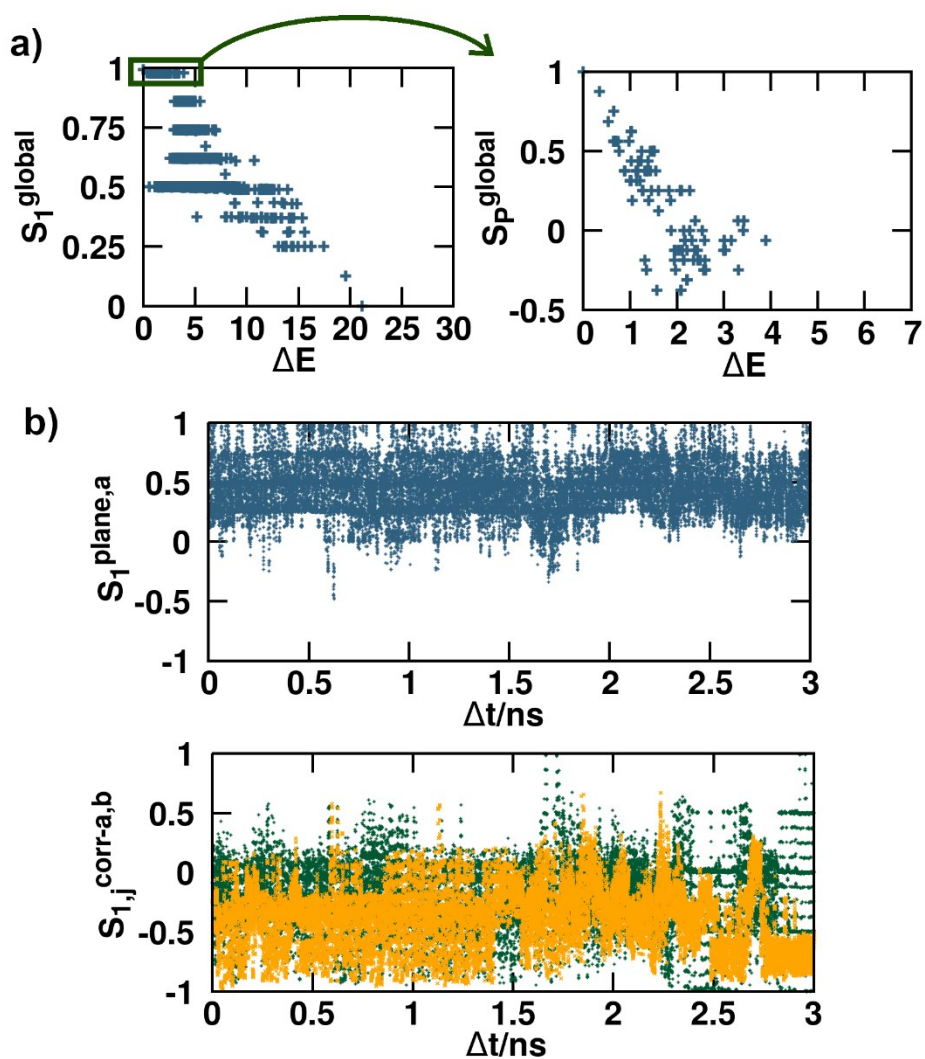

## 8. Global ordering of all-meta-stable MOFs

**Figure S16.** a) Order parameter  $S_1^{\text{global}}$  and  $S_p^{\text{global}}$  indicating local and global linker arrangement of the **all-stable** MOF. b) visualizes different possible rotations of the linker during the GA construction and MD simulations. c) Order parameter  $S_1^{\text{plane-a}}$  during a MD simulation, as well as its coupled correlation parameters  $S_{1,1}^{\text{corr-a,b}}$  (orange) and  $S_{1,2}^{\text{corr-a,b}}$  (green) of the **all-meta-stable** MOF, describing the correlation between the both planes in the unit cell, which are perpendicular to the a-direction and both planes perpendicular to the b-direction.

## References

1. E. Kolodzeiski and S. Amirjalayer, *Chem. Eur. J.*, 2020, **26**, 1263-1268.
2. E. Kolodzeiski and S. Amirjalayer, *The Journal of Physical Chemistry B*, 2020, **124**, 10879-10888.
3. M. Tafipolsky, S. Amirjalayer and R. Schmid, *J. Comput. Chem.*, 2007, **28**, 1169-1176.
4. S. Amirjalayer and R. Schmid, *J. Phys. Chem. C*, 2016, **120**, 27319-27327.
5. M. Tafipolsky and R. Schmid, *J. Phys. Chem. B*, 2009, **113**, 1341-1352.
6. A. D. Becke, *J. Chem. Phys.*, 1993, **98**, 5648-5652.
7. S. Grimme, J. Antony, S. Ehrlich and H. Krieg, *J. Chem. Phys.*, 2010, **132**, 154104.
8. A. K. Wilson, D. E. Woon, K. A. Peterson and T. H. Dunning, *J. Chem. Phys.*, 1999, **110**, 7667-7676.
9. M. J. Frisch, G. W. Trucks, H. B. Schlegel, G. E. Scuseria, M. A. Robb, J. R. Cheeseman, G. Scalmani, V. Barone, G. A. Petersson, H. Nakatsuji, X. Li, M. Caricato, A. V. Marenich, J. Bloino, B. G. Janesko, R. Gomperts, B. Mennucci, H. P. Hratchian, J. V. Ortiz, A. F. Izmaylov, J. L. Sonnenberg, Williams, F. Ding, F. Lipparini, F. Egidi, J. Goings, B. Peng, A. Petrone, T. Henderson, D. Ranasinghe, V. G. Zakrzewski, J. Gao, N. Rega, G. Zheng, W. Liang, M. Hada, M. Ehara, K. Toyota, R. Fukuda, J. Hasegawa, M. Ishida, T. Nakajima, Y. Honda, O. Kitao, H. Nakai, T. Vreven, K. Throssell, J. A. Montgomery Jr., J. E. Peralta, F. Ogliaro, M. J. Bearpark, J. J. Heyd, E. N. Brothers, K. N. Kudin, V. N. Staroverov, T. A. Keith, R. Kobayashi, J. Normand, K. Raghavachari, A. P. Rendell, J. C. Burant, S. S. Iyengar, J. Tomasi, M. Cossi, J. M. Millam, M. Klene, C. Adamo, R. Cammi, J. W. Ochterski, R. L. Martin, K. Morokuma, O. Farkas, J. B. Foresman and D. J. Fox, *Gaussian 16 Rev. C.01*, Wallingford, CT, 2016.
10. U. C. Singh and P. A. Kollman, *J. Comput. Chem.*, 1984, **5**, 129-145.
